# Supplementary material for: In Vivo Biokinetics of 177Lu-OPS201 in Mice and Pigs as a Model for Predicting Human Dosimetry
Source: Hindawi journal article supplement (doi:10.1155/2019/6438196), 2019-01-03
Supplement: f1 [file 6438196.f1.pdf]

# **In-vivo biokinetics of $^{177}\text{Lu}$ -OPS201 in mice and pigs as a model for predicting human dosimetry**

## **Supplementary file**

Beykan Seval<sup>1</sup>, Fani Melpomeni<sup>2</sup>, Jensen Svend Borup<sup>3,4</sup>, Nicolas Guillaume<sup>5</sup>, Wild Damian<sup>5</sup>, Kaufmann Jens<sup>6</sup>, Lassmann Michael<sup>1</sup>

1: Department of Nuclear Medicine, University of Würzburg, Würzburg, Germany

2: Division of Radiopharmaceutical Chemistry, University Hospital Basel, Basel, Switzerland

3: Department of Nuclear Medicine, Aalborg University Hospital, Aalborg, Denmark

4: Department of Chemistry and Bioscience, Aalborg University, Aalborg, Denmark

5: Division of Nuclear Medicine, University Hospital Basel, Basel, Switzerland

6: Octreopharm Science GmbH, Ipsen Group, Berlin, Germany

Supplementary Table 1: Calculated lambda values used to create the TACs by using the optimal fit function parameters from NUKFIT [1] for each species' organs and blood including standard error (SD) and coefficient of variation (CV) values determined assuming Gaussian error propagation:

**Blood:**

Mice Blood

|             | Value  | SD       | CV     | NUKFIT function used                                                                          |
|-------------|--------|----------|--------|-----------------------------------------------------------------------------------------------|
| A1          | 0.4158 | 0.0596   | 0.1432 | $A1 \cdot e^{-(\lambda_1 + \lambda_{phys}) \cdot t} + A2 \cdot e^{-(\lambda_{phys}) \cdot t}$ |
| $\lambda_1$ | 0.3794 | 0.0509   | 0.1342 |                                                                                               |
|             |        | 7.6316e- |        |                                                                                               |
| A2          | 0.0107 | 04       | 0.0710 |                                                                                               |

Pig Blood

|             | Value     | SD        | CV     | NUKFIT function used                                                                                                                                           |
|-------------|-----------|-----------|--------|----------------------------------------------------------------------------------------------------------------------------------------------------------------|
| A1          | 0.0208    | 8.203E-04 | 0.0395 | $A1 \cdot e^{-(\lambda_1 + \lambda_{phys}) \cdot t} + A2 \cdot e^{-(\lambda_2 + \lambda_{phys}) \cdot t} + A3 \cdot e^{-(\lambda_3 + \lambda_{phys}) \cdot t}$ |
| $\lambda_1$ | 11.8943   | 0.5747    | 0.0483 |                                                                                                                                                                |
| A2          | 0.0020    | 8.305E-05 | 0.0412 |                                                                                                                                                                |
| $\lambda_2$ | 0.4066    | 0.0195    | 0.0480 |                                                                                                                                                                |
| A3          | 1.691E-04 | 8.635E-06 | 0.0511 |                                                                                                                                                                |
| $\lambda_3$ | 0.0076    | 3.076E-04 | 0.0405 |                                                                                                                                                                |

Human Blood

|             | Value     | SD        | CV     | NUKFIT function used                                                                                      |
|-------------|-----------|-----------|--------|-----------------------------------------------------------------------------------------------------------|
| A1          | 0.0022    | 4.105E-04 | 0.1848 | $A1 \cdot e^{-(\lambda_1 + \lambda_{phys}) \cdot t} + A2 \cdot e^{-(\lambda_2 + \lambda_{phys}) \cdot t}$ |
| $\lambda_1$ | 1.4713    | 0.3513    | 0.2388 |                                                                                                           |
| A2          | 6.169E-04 | 6.576E-05 | 0.1066 |                                                                                                           |
| $\lambda_2$ | 0.0609    | 0.0072    | 0.1181 |                                                                                                           |

For  $^{177}\text{Lu}$ :  $\lambda_{phys} = \frac{\ln(2)}{T_{1/2}} = \frac{0.6931}{159.93 \text{ h}} = 0.00435 \text{ h}^{-1}$  [2].

**Liver:**

## Mice Liver

|             | Value  | SD     | CV     | NUKFIT function used                                                                                        |
|-------------|--------|--------|--------|-------------------------------------------------------------------------------------------------------------|
| A1          | 1.0394 | 0.2313 | 0.2225 | $A1 \cdot e^{-(\lambda_1 + \lambda_{\text{phys}}) \cdot t} + A2 \cdot e^{-(\lambda_{\text{phys}}) \cdot t}$ |
| $\lambda_1$ | 0.4724 | 0.1160 | 0.2455 |                                                                                                             |
| A2          | 0.3168 | 0.0183 | 0.0577 |                                                                                                             |

## Pig Liver

|             | Value  | SD       | CV     | NUKFIT function used                                                                                                    |
|-------------|--------|----------|--------|-------------------------------------------------------------------------------------------------------------------------|
| A1          | 2.9475 | 0.4470   | 0.1517 | $A1 \cdot e^{-(\lambda_1 + \lambda_{\text{phys}}) \cdot t} + A2 \cdot e^{-(\lambda_2 + \lambda_{\text{phys}}) \cdot t}$ |
| $\lambda_1$ | 0.138  | 0.0669   | 0.4839 |                                                                                                                         |
| A2          | 3.7373 | 0.1986   | 0.0531 |                                                                                                                         |
| $\lambda_2$ | 0.0053 | 3.29E-04 | 0.0620 |                                                                                                                         |

## Human Liver

|             | Value  | SD     | CV     | NUKFIT function used                                        |
|-------------|--------|--------|--------|-------------------------------------------------------------|
| A1          | 5.4340 | 0.3613 | 0.0665 | $A1 \cdot e^{-(\lambda_1 + \lambda_{\text{phys}}) \cdot t}$ |
| $\lambda_1$ | 0.0059 | 0.0018 | 0.3005 |                                                             |

**Kidney:**

## Mice Kidneys

|             | Value  | SD     | CV     | NUKFIT function used                                                                                        |
|-------------|--------|--------|--------|-------------------------------------------------------------------------------------------------------------|
| A1          | 2.3300 | 0.1580 | 0.0678 | $A1 \cdot e^{-(\lambda_1 + \lambda_{\text{phys}}) \cdot t} + A2 \cdot e^{-(\lambda_{\text{phys}}) \cdot t}$ |
| $\lambda_1$ | 0.0183 | 0.0031 | 0.1683 |                                                                                                             |
| A2          | 0.1790 | 0.0679 | 0.3794 |                                                                                                             |

## Pig Kidneys

|             | Value  | SD       | CV     | NUKFIT function used                                                                                                    |
|-------------|--------|----------|--------|-------------------------------------------------------------------------------------------------------------------------|
| A1          | 6.0940 | 0.1999   | 0.0328 | $A1 \cdot e^{-(\lambda_1 + \lambda_{\text{phys}}) \cdot t} - A1 \cdot e^{-(\lambda_2 + \lambda_{\text{phys}}) \cdot t}$ |
| $\lambda_1$ | 0.0036 | 2.43E-04 | 0.0682 |                                                                                                                         |
| $\lambda_2$ | 1.7558 | 0.1996   | 0.1137 |                                                                                                                         |

## Human Kidneys

|             | Value  | SD     | CV     | NUKFIT function used                                        |
|-------------|--------|--------|--------|-------------------------------------------------------------|
| A1          | 4.7877 | 0.3183 | 0.0665 | $A1 \cdot e^{-(\lambda_1 + \lambda_{\text{phys}}) \cdot t}$ |
| $\lambda_1$ | 0.0038 | 0.0018 | 0.4588 |                                                             |

Supplementary Table 2a: The median and mean percentage injected radioactivity (%A) values per ml in blood of mice and humans with corresponding standard deviation (SD)

| Time(h) | Median % A/ml Blood Mice   | Mean %A /ml Blood Mice   | SD    |
|---------|----------------------------|--------------------------|-------|
| 1       | 0.296                      | 0.1305                   | 0.030 |
| 4       | 0.099                      | 0.0332                   | 0.013 |
| 24      | 0.025                      | 0.0085                   | 0.005 |
| 72      | 0.007                      | 0.0036                   | 0.003 |
| Time(h) | Median % A/ml Blood Humans | Mean %A /ml Blood Humans | SD    |
| 0.333   | 0.0020                     | 0.0028                   | 0.003 |
| 0.5     | 0.0016                     | 0.0022                   | 0.002 |
| 1       | 0.0010                     | 0.0016                   | 0.002 |
| 2       | 0.0007                     | 0.0011                   | 0.001 |
| 3       | 0.0006                     | 0.0009                   | 0.001 |
| 5       | 0.0004                     | 0.0007                   | 0.001 |
| 22.5    | 0.0001                     | 0.0002                   | 0.000 |

Supplementary Table 2b: The mean percentage injected radioactivity (%A) values per ml in kidneys and liver of mice and humans with corresponding standard deviation (SD)

| Time(h) | Mean A% Kidneys Mice | SD    |
|---------|----------------------|-------|
| 1       | 2.600                | 0.162 |
| 4       | 2.100                | 0.135 |
| 24      | 1.570                | 0.127 |
| 72      | 0.590                | 0.042 |
| 168     | 0.140                | 0.131 |

| Time(h) | Mean A% Kidneys Humans | SD    |
|---------|------------------------|-------|
| 1       | 5.585                  | 2.140 |
| 3       | 5.303                  | 1.713 |
| 24      | 4.128                  | 1.427 |
| 72      | 2.678                  | 1.072 |

| Time(h) | Mean A% Liver Mice | SD    |
|---------|--------------------|-------|
| 1       | 0.970              | 0.308 |
| 4       | 0.470              | 0.132 |
| 24      | 0.236              | 0.052 |
| 72      | 0.170              | 0.042 |
| 168     | 0.196              | 0.042 |

| Time(h) | Mean A% Liver Humans | SD    |
|---------|----------------------|-------|
| 1       | 4.978                | 2.548 |
| 3       | 4.480                | 2.289 |
| 24      | 4.015                | 1.825 |
| 72      | 2.688                | 1.148 |

## References

- [1] Kletting P, Schimmel S, Kestler HA, Hanscheid H, Luster M, Fernandez M, et al. Molecular radiotherapy: the NUKFIT software for calculating the time-integrated activity coefficient. *Med Phys* 2013;40:102504.
- [2] M.M.Be VC, C.Dulieu, E.Browne, V.Chechev, N.Kuzmenko, R.Helmer, A.Nichols, E.Schonfeld, R.Dersch. Monographie BIPM-5 - Table of Radionuclides,. Bureau International des Poids et Mesures 2004;2:151-242.
